# Supplementary material for: Prematurely terminated intron-retaining mRNAs invade axons in SFPQ null-driven neurodegeneration and are a hallmark of ALS
Source: PubMed Central journal article supplement (PMC9681851; doi:10.1038/s41467-022-34331-4), 2022-11-22
Supplement: 41467_2022_34331_MOESM1_ESM.pdf [file 41467_2022_34331_MOESM1_ESM.pdf]

## Supplementary Information for

### **Prematurely terminated intron-retaining mRNAs invade axons in SFPQ null-driven neurodegeneration and are a hallmark of ALS**

Richard Taylor\*, Fursham Hamid, Triona Fielding, Patricia M. Gordon, Megan Maloney,  
Eugene V. Makeyev, Corinne Houart\*

Correspondence to: richard.taylor@kcl.ac.uk, corinne.houart@kcl.ac.uk

#### **This file includes:**

Supplementary Figs. 1 to 12  
Supplementary Tables 1 and 2

#### **Other Supplementary Materials for this manuscript include the following:**

Supplementary Data 1 to 10

## Supplementary Figures

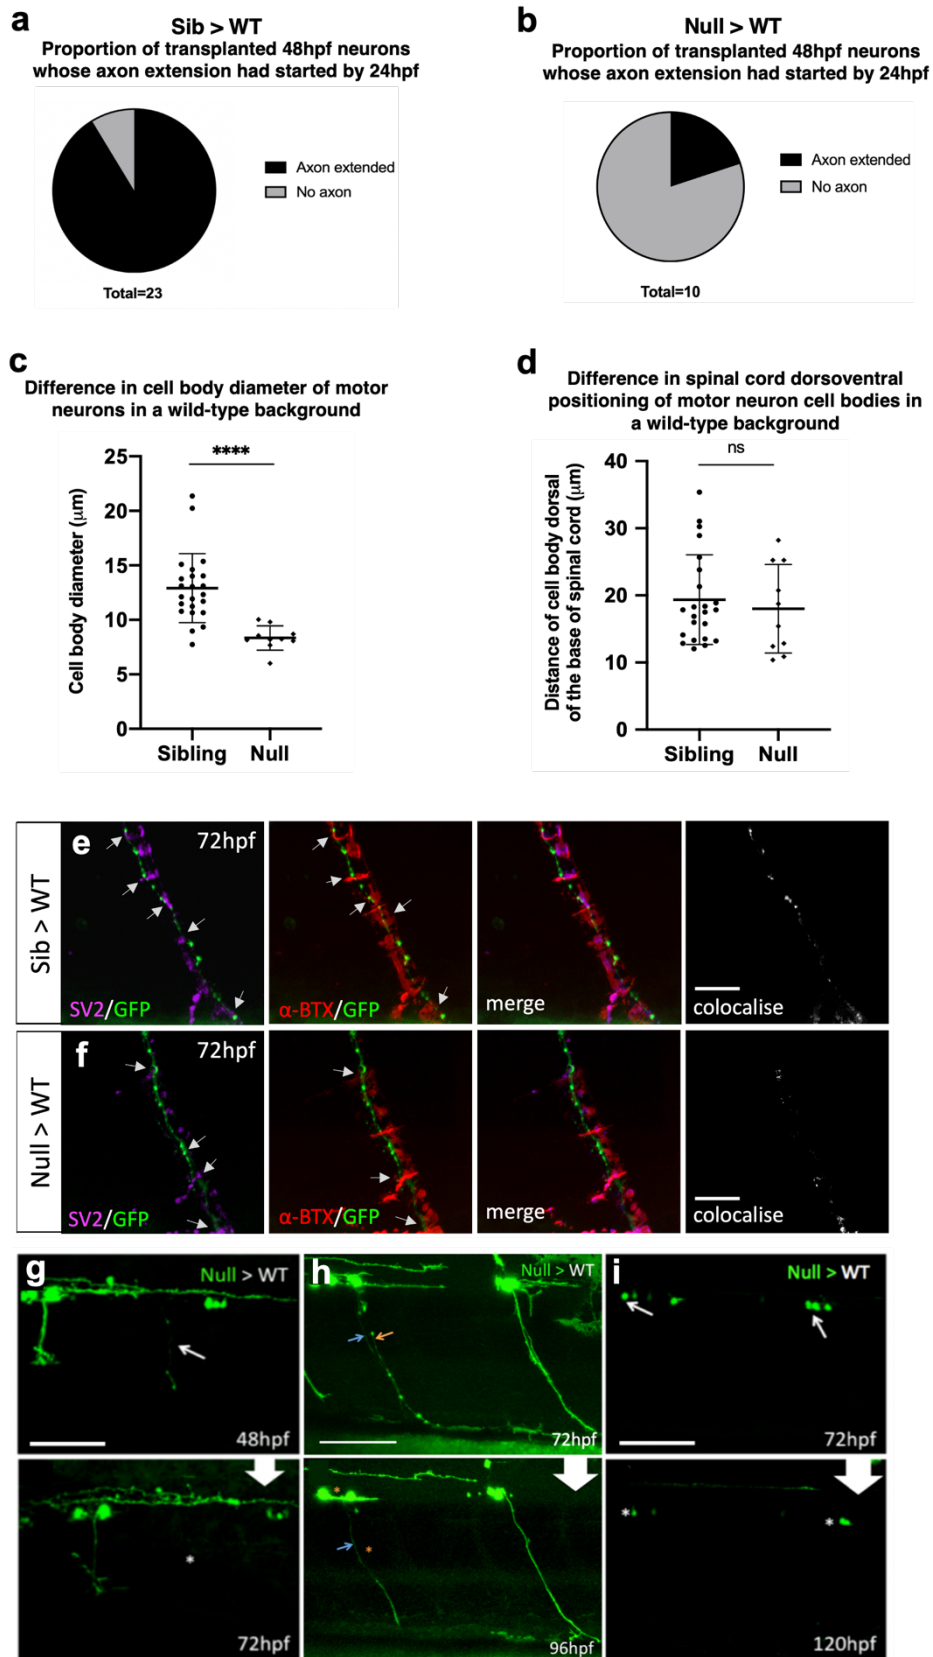

**Supplementary Fig. 1: Null motor neurons in a wild-type background show delayed axon extension, branching and synaptogenesis defects, and degenerate at later time points of observation. (a-b)** Quantification in 48hpf embryos of the proportion of transplanted GFP<sup>+</sup> neurons whose axons had extended and exited the spinal cord by 24hpf. **(a)** 87% sibling motor neurons had

initiated axon extension by 24hpf, (Sib>WT: 23cells, 8 hosts (5 donors)). **(b)** Only 20% of null motor neurons had initiated extension by 24hpf and none of these had exited the spinal cord, unlike sibling axons which had all exited (Null>WT: 10 neurons, 3 hosts (3 donors)). All sibling and null motor axons at 72hpf were already present at 48hpf. Time-lapse experiments indicated that null axon growth starts at around 40hpf. **(c)** Sibling versus null transplanted motor neuron soma diameter. Sib>WT: 23cells, 8 hosts (5 donors); Null>WT: 10 neurons, 3 hosts, (3 donors). Two-tailed unpaired ttest with Welch's correction: \*\*\*\*= $p < 0.0001$ ). Means plotted with SD. **(d)** Dorsoventral spinal cord position of sibling and null transplanted motor neuron somas. No difference suggests they do not belong to different motor neuron classes with different axon extension times. Measurements made from the notochord/spinal cord boundary to soma centre (Sib>WT: 23cells, 8 hosts (5 donors); Null>WT: 10 neurons, 3 hosts, (3 donors); Two-tailed unpaired ttest with Welch's correction: ( $p = 0.598$ ). Mean plotted with SD. **(e-f)** Confocal z-projections (10 $\mu$ m), of transplanted *sfpq*; tg(*mnx1*:GFP) sibling **(e)** & null **(f)** motor neuron distal axons in wild-type hosts. Scale bars 10 $\mu$ m. Arrows show co-localising pre- and post-synaptic markers. Automated detection indicates points of SV2 and  $\alpha$ -BTX overlap (mature synapses). **(g-i)** Confocal z-projections (100 $\mu$ m) showing degenerating null motor neurons in a wild-type background - observed each time the experiment was performed but not in siblings. Experiment repeated at least three times. Scale bars 50 $\mu$ m. **(g)** Null axon (arrow) disappears by 72hpf (bottom, asterisk). **(h)** Two null motor neuron axons (blue & orange arrows) with one exhibiting fragmentation (orange arrow). One day later, **(h, lower)**, only one motor neuron and axon remain (blue arrow). Asterisk indicates the missing neuron. **(i)** Some null motor neuron somas show no neuronal projections (arrows) at any point during observation and often disappear (lower, asterisks). Source data are provided as a Source Data file.

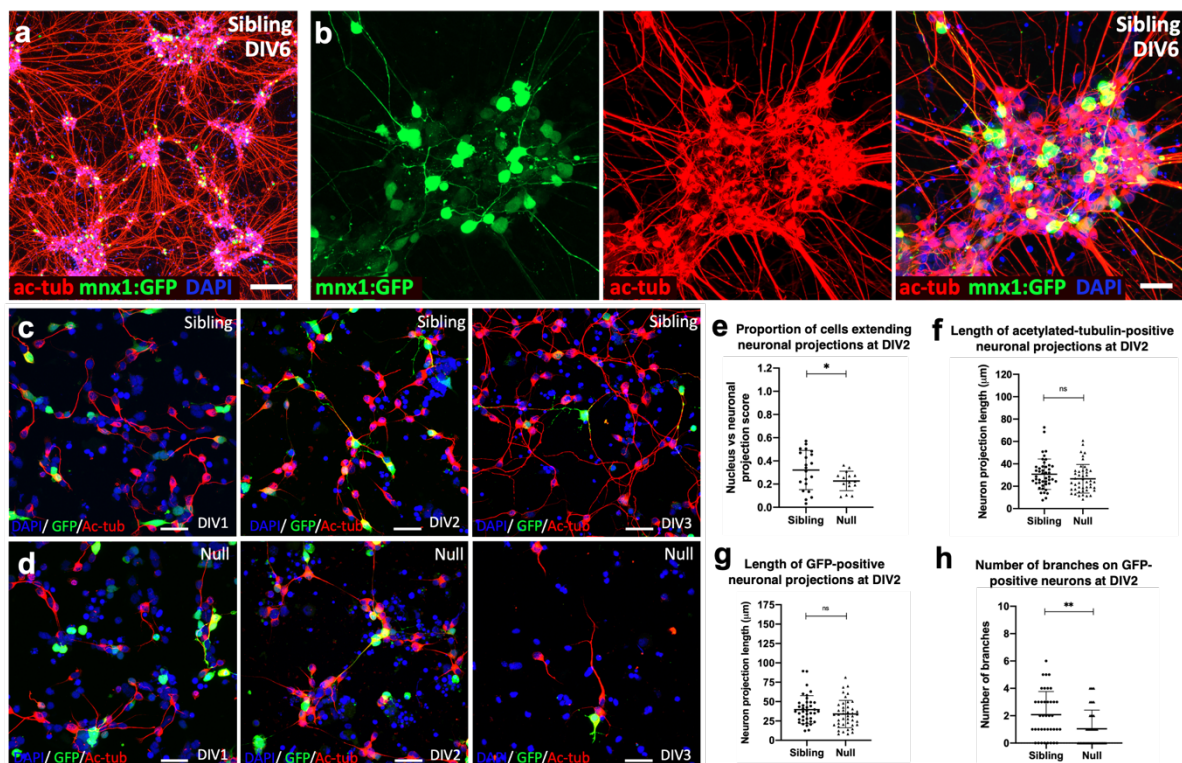

**Supplementary Fig. 2: SFPQ-deprived zebrafish primary neurons extend transient neurites *in vitro*.** **(a)** Confocal z-projections (20 $\mu$ m) of DIV6 primary cell cultures from dissociated *sfpq*,

*tg(mnx1:GFP)* embryos. Neurites are immunolabelled using acetylated-tubulin antibody (red). DAPI labels nuclei (blue). Scale bar 100 $\mu$ m. **(b)** High magnification images of cultures described in **(a)**. Scale bar: 20 $\mu$ m. **(c-d)** Confocal images of sibling **(c)** and null **(d)** primary cell cultures between DIV1-DIV3. Immunolabelling of acetylated-tubulin (red) allowed visualisation of neurites. GFP was targeted to visualise motor neurons. Cell nuclei are labelled by DAPI (blue). Scale bars: 20 $\mu$ m. **(e)** Quantification of the proportion of DAPI stained nuclei associated with acetylated-tubulin-positive neurites in sibling versus null cultures at DIV2,  $*=p:0.035$ . n = Sibling: 21 replicates; Null: 15 replicates. N = 3 experiments. Two-tailed unpaired ttest with Welch's correction. Mean plotted with SD. **(f)** Quantification of sibling versus null acetylated-tubulin-positive neurite length at DIV2,  $p=0.41$ . n = Sibling: 45 neurites; Null: 45 neurites; 3 independent experiments. Two-tailed unpaired ttest with Welch's correction. Mean plotted with SD. **(g)** Quantification of sibling versus null, GFP-positive neurite length in primary cultures at DIV2,  $p = 0.15$ . n = Sibling: 39 neurites; Null: 43 neurites; 3 independent experiments. Two-tailed unpaired ttest with Welch's correction. Mean plotted with SD. **(h)** Difference in branch number on sibling and null GFP-positive neurites at DIV2,  $*=p:0.004$ . n = Sibling: 39 neurites; Null: 43 neurites; 3 independent experiments. Two-tailed unpaired ttest with Welch's correction. Mean plotted with SD. Source data are provided as a Source Data file.

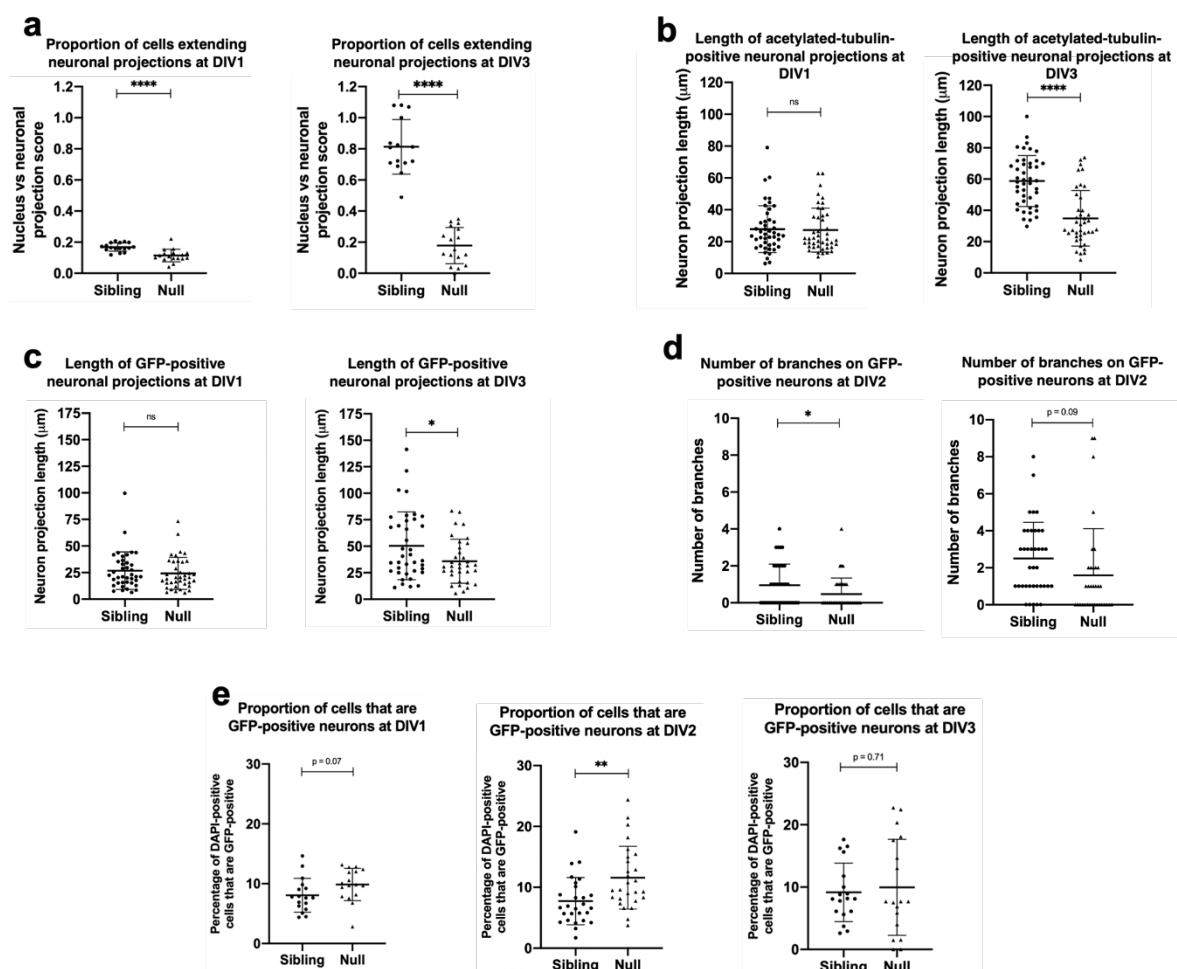

**Supplementary Fig. 3: Characterisation of *sfpq*, *tg(mnx1:GFP)* derived primary neuronal cultures between DIV1-3.** **(a)** Quantification of the proportion of DAPI stained nuclei extending acetylated-tubulin-positive axons in sibling versus null cultures at DIV1 ( $****=p:0.00006$ , n = Sibling: 17 replicates, Null: 17 replicates. N=3 independent experiments) and DIV3 ( $****=p:3.7E-13$ , n = Sibling: 15 replicates, Null: 17 replicates. N= 3 independent experiments). Two-tailed Unpaired

ttest performed with Welch's correction. Mean plotted with SD. **(b)** Quantification of sibling versus null axon lengths by measuring acetylated-tubulin staining at DIV1 ( $p=0.84$ . n = Sibling: 45 neurites, Null: 44 neurites. Three independent experiments) & DIV3 ( $****=p:8.2E-09$ . n = Sibling: 44 neurites, Null: 40 neurites. Three independent experiments). Two-tailed unpaired ttest with Welch's correction. Mean plotted with SD. **(c)** Quantification of sibling and null GFP-positive neurite lengths at DIV1 ( $p=0.49$ . n = Sibling: 39 neurites, Null: 38 neurites. Three independent experiments) & DIV3 ( $*=p:0.024$ . n = Sibling: 38 neurites, Null: 34 neurites. Three independent experiments). Two-tailed unpaired ttest with Welch's correction. Mean plotted with SD. **(d)** Quantification of the number of branches exhibited by sibling and null GFP-positive neurites in cultures from *sfpq*, *tg(mnx1:GFP)* embryos at DIV1 ( $*=p:0.043$ . n = Sibling: 39 neurites, Null: 38 neurites. Three independent experiments) & DIV3 ( $p=0.09$ . n = Sibling: 38 neurites, Null: 34 neurites. Three independent experiments). Two-tailed unpaired ttest with Welch's correction. Mean plotted with SD. **(e)** Quantification of the percentage of DAPI stained nuclei which were also GFP-positive in sibling and null cultures at DIV1 ( $p=0.07$ . n = Sibling: 17 replicates, Null: 17 replicates. Three independent experiments), DIV2 ( $**=p:0.0031$ . n = Sibling: 27 replicates, Null: 27 replicates. Three independent experiments), & DIV3 ( $p=0.71$ . n = Sibling: 18 replicates, Null: 17 replicates. Three independent experiments) derived from *sfpq*, *tg(mnx1:GFP)* embryos. GFP-positive cells are mostly motor neurons, and some ventral interneurons. Two-tailed unpaired ttest with Welch's correction. Mean plotted with SD. Source data are provided as a Source Data file.

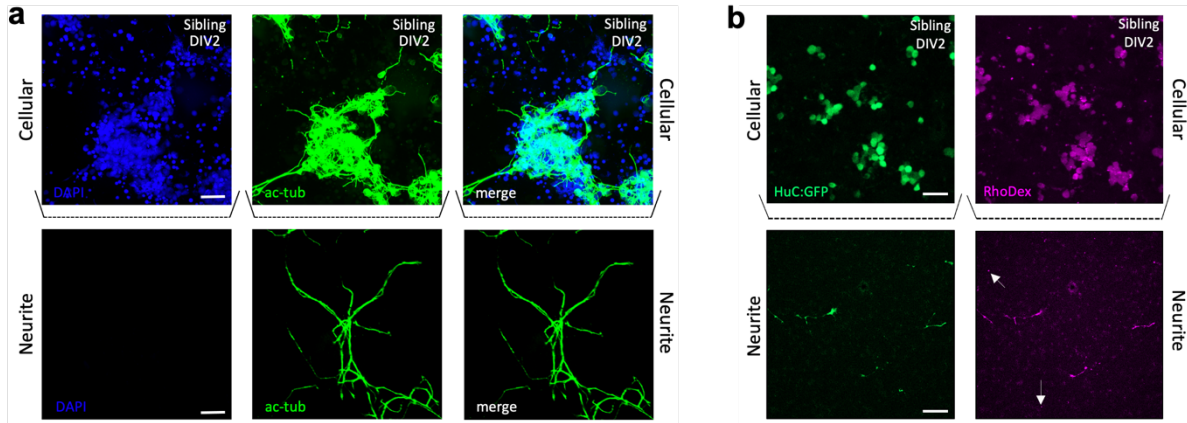

**c**

| GO-term    | Description                            | Count in network | Strength | False discovery rate |
|------------|----------------------------------------|------------------|----------|----------------------|
| GO:0005829 | Cytosol                                | 56 of 3167       | 0.27     | 0.00078              |
| GO:0030117 | Membrane coat                          | 8 of 94          | 0.95     | 0.0011               |
| GO:0030424 | Axon                                   | 19 of 637        | 0.5      | 0.0023               |
| GO:0030120 | Vesicle coat                           | 6 of 55          | 1.06     | 0.0031               |
| GO:0030132 | Clathrin coat of coated pit            | 4 of 17          | 1.4      | 0.0045               |
| GO:0030135 | Coated vesicle                         | 10 of 215        | 0.69     | 0.0059               |
| GO:0043005 | Neuron projection                      | 30 of 1458       | 0.34     | 0.0066               |
| GO:0030426 | Growth cone                            | 9 of 182         | 0.72     | 0.0078               |
| GO:0030662 | Coated vesicle membrane                | 7 of 107         | 0.84     | 0.0089               |
| GO:0030118 | Clathrin coat                          | 5 of 48          | 1.04     | 0.0113               |
| GO:0030133 | Transport vesicle                      | 12 of 351        | 0.56     | 0.0125               |
| GO:0098805 | Whole membrane                         | 27 of 1331       | 0.33     | 0.0133               |
| GO:0030666 | Endocytic vesicle membrane             | 5 of 61          | 0.94     | 0.025                |
| GO:0012507 | ER to Golgi transport vesicle membrane | 4 of 35          | 1.08     | 0.0294               |
| GO:0030127 | COPII vesicle coat                     | 3 of 16          | 1.3      | 0.0412               |
| GO:0014069 | Postsynaptic density                   | 12 of 411        | 0.49     | 0.0412               |
| GO:0036464 | Cytoplasmic ribonucleoprotein granule  | 8 of 205         | 62       | 0.0479               |
| GO:0030659 | Cytoplasmic vesicle membrane           | 13 of 493        | 0.45     | 0.0485               |

**d**

| Cellular   |                 | Neurite           |                   |
|------------|-----------------|-------------------|-------------------|
| RNase_MRP  | ppib            | si:ch211-195b11.4 | gnao1a            |
| RNaseP_nuc | mdka            | elav4             | ddx3b             |
| hbbe1.3    | snoU85          | h3f3b.1           | arl8a             |
| SNORA73    | scarb2a         | klh3              | rab14             |
| SNORA73    | ctsla           | hnrmpaba          | mpta              |
| hbbae3     | sdca4           | stmn2b            | gnb1a             |
| HBZ        | atp2a1          | gnb1b             | dnaja2l           |
| hbbe3      | scg2b           | nova2             | G3BP2 (1 of many) |
| SNORA73    | si:dkey-102m7.3 | mri1              | si:ch73-46j18.5   |
| CR385078.3 | cd81a           | pbx4              | rf38              |
| RNaseP_nuc | U4              | mast2             | camk2g1           |

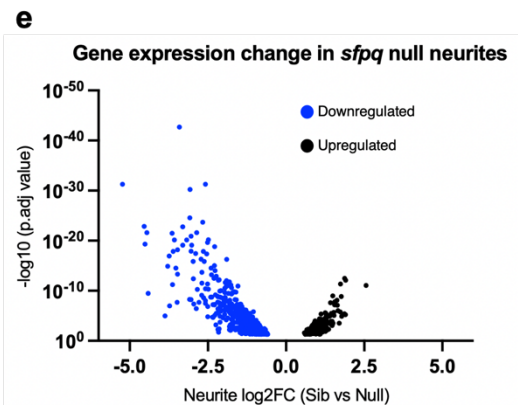

**f**

| GO term    | Cellular compartment (GO)               | Count in network | Strength | False discovery rate |
|------------|-----------------------------------------|------------------|----------|----------------------|
| GO:0030424 | Axon                                    | 28 of 637        | 0.59     | 5.13E-07             |
| GO:0120025 | Plasma membrane bounded cell projection | 56 of 2292       | 0.33     | 8.79E-06             |
| GO:0042995 | Cell projection                         | 57 of 2421       | 0.32     | 2.00E-05             |
| GO:0043005 | Neuron projection                       | 39 of 1458       | 0.37     | 0.00011              |
| GO:0005856 | Cytoskeleton                            | 54 of 2385       | 0.3      | 0.00011              |
| GO:0005829 | Cytosol                                 | 65 of 3167       | 0.26     | 0.00019              |
| GO:0030117 | Membrane coat                           | 9 of 94          | 0.93     | 0.00023              |
| GO:0030120 | Vesicle coat                            | 7 of 55          | 1.05     | 0.00047              |
| GO:0045202 | Synapse                                 | 37 of 1493       | 0.34     | 0.00071              |
| GO:0150034 | Distal axon                             | 14 of 293        | 0.62     | 0.00078              |
| GO:0030426 | Growth cone                             | 11 of 182        | 0.73     | 0.00085              |
| GO:0030118 | Clathrin coat                           | 6 of 48          | 1.04     | 0.0018               |
| GO:0030132 | Clathrin coat of coated pit             | 4 of 17          | 1.32     | 0.0045               |
| GO:0014069 | Postsynaptic density                    | 15 of 411        | 0.51     | 0.0058               |
| GO:0012506 | Vesicle membrane                        | 17 of 515        | 0.46     | 0.0062               |
| GO:0036477 | Somatodendritic compartment             | 22 of 803        | 0.38     | 0.0082               |
| GO:0120111 | Neuron projection cytoplasm             | 6 of 68          | 0.89     | 0.0083               |
| GO:0043194 | Axon initial segment                    | 4 of 24          | 1.17     | 0.009                |
| GO:0030175 | Filopodium                              | 7 of 104         | 0.77     | 0.009                |
| GO:0030135 | Coated vesicle                          | 10 of 215        | 0.61     | 0.009                |
| GO:0030133 | Transport vesicle                       | 13 of 351        | 0.51     | 0.009                |
| GO:0030659 | Cytoplasmic vesicle membrane            | 16 of 493        | 0.46     | 0.009                |
| GO:0030425 | Dendrite                                | 18 of 593        | 0.43     | 0.009                |
| GO:1904115 | Axon cytoplasm                          | 5 of 51          | 0.94     | 0.0129               |
| GO:0030125 | Clathrin vesicle coat                   | 4 of 28          | 1.1      | 0.0134               |
| GO:0030027 | Lamellipodium                           | 10 of 232        | 0.58     | 0.0134               |
| GO:0005905 | Clathrin-coated pit                     | 6 of 93          | 0.75     | 0.0247               |
| GO:0098858 | Actin-based cell projection             | 9 of 213         | 0.57     | 0.0262               |
| GO:000932  | P-body                                  | 6 of 95          | 0.75     | 0.0265               |
| GO:0031252 | Cell leading edge                       | 14 of 460        | 0.43     | 0.0269               |
| GO:0098794 | Postsynapse                             | 19 of 749        | 0.35     | 0.0306               |
| GO:0031209 | SCAR complex                            | 3 of 17          | 1.19     | 0.0352               |
| GO:0043025 | Neuronal cell body                      | 13 of 423        | 0.43     | 0.0352               |
| GO:0098805 | Whole membrane                          | 28 of 1331       | 0.27     | 0.0375               |
| GO:0044304 | Main axon                               | 5 of 70          | 0.8      | 0.0378               |
| GO:0032433 | Filopodium tip                          | 3 of 18          | 1.17     | 0.0381               |
| GO:0070382 | Exocytic vesicle                        | 9 of 231         | 0.54     | 0.0385               |
| GO:0016513 | Core-binding factor complex             | 2 of 4           | 1.64     | 0.0421               |
| GO:0030131 | Clathrin adaptor complex                | 3 of 19          | 1.14     | 0.0421               |

**Supplementary Fig. 4: Primary cells cultured in transwell inserts for separation of cellular and neurite tissues. (a)** Cells from dissociated zebrafish embryos following 2-days of culture in a transwell insert. Scale bar 20µm. Cellular/upper surface: Nuclei labelled by DAPI (blue) indicate cell somas are restricted to this side of the membrane. Many axons labelled by acetylated-tubulin (green) are also observed here. Neurite/lower surface: No nuclei here indicate that no somas pass through 1µm pores. Neurites emerge on the underside and continue their extension after passing through 1µm pores. Experiment repeated three times. **(b)** Transwell membrane after primary cells labelled with rhodamine dextran from tg(HuC:GFP) embryos (in which all neurons are GFP+) have been cultured for 2-days. The vast majority of tissue in the neurite compartment is rhodamine-positive and GFP-positive, with minimal rhodamine-positive and GFP-negative tissue (arrows) observed, indicating a

high degree of purity. Experiment repeated three times. Scale bar 20 $\mu$ m. (c) Table showing the cellular compartment gene ontology terms for transcripts enriched in the null neurite compartment, indicating the tissue occupying this compartment is predominantly neurites. (d) Most highly expressed transcripts in sibling cellular (left) and neurite (right) compartments. Cellular transcripts include those coding for nuclear factors such as small nucleolar and small nuclear RNAs. Neurite transcripts coding for neuron projection related proteins and include microtubule constituents and microtubule associated proteins. (e) Comparing gene expression in sibling and null neurite transcriptomes (Two-sided Fisher's test,  $p < 0.00001$ ) revealed predominantly downregulation ( $n=597$  downregulated genes, Supplementary data 2 (GO term information in main text);  $n=221$  upregulated genes, Supplementary data 3 (GO term analysis of these genes was uninformative, Supplementary data 9). 62/221 genes (28%; Supplementary data 3) showed more upregulation in neurites than in the cellular compartment (neurite-specific upregulation). (f) Table showing cell compartment gene ontology terms for transcripts enriched in the null neurite compartment indicating the tissue occupying it is predominantly neurites.

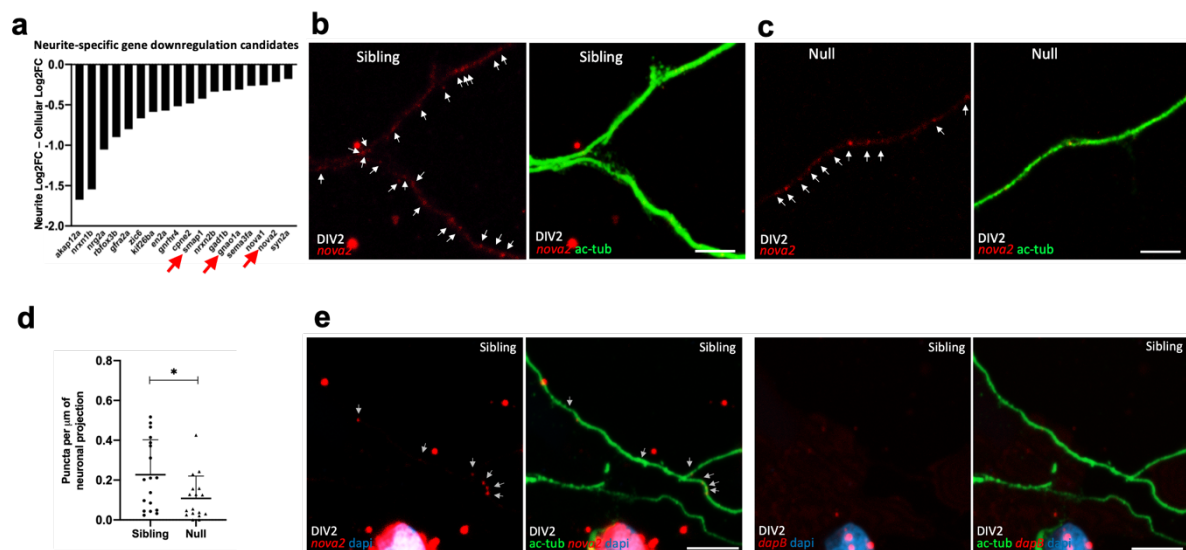

**Supplementary Fig. 5: Neurite-specific downregulation of transcripts in absence of SFPQ. (a)** Extent of neurite-specific gene downregulation in null samples from RNAseq data for 18 genes involved in axonogenesis, taken from the 185 genes in total showing neurite-specific downregulation. Neurite-specific downregulation was identified by calculating the difference in Log2FC values for changes occurring in cellular and neurite compartment comparisons.  $N = 3$  biological replicates for each genotype and cell compartment. (b-c) Images of RNAscope labelling of *nova2* puncta (arrows) in sibling (b) and null (c) cells in culture at DIV2. Scale bar 5 $\mu$ m. (d) Quantification of *nova2*-positive puncta in sibling versus null neurites. Each datapoint represents a single neurite (sibling:  $n=18$ ; null:

n=17). Three independent experiments. Two-tailed Unpaired ttest with Welch's correction,  $*=p:0.02$ . Mean plotted with SD. Source data are provided as a Source Data file. (e) Confocal images of DIV2 cells plated following dissociation of 24hpf embryos. Arrows indicate *nova2* RNAscope expression puncta in neurites. A probe targeting the bacterial gene *dapb* was used as a negative control to reveal tissue prone to non-specific labelling. This probe was incubated with two biologically independent samples, and no *dapb* puncta were observed in neurites on either occasion. Scale bar 5 $\mu$ m.

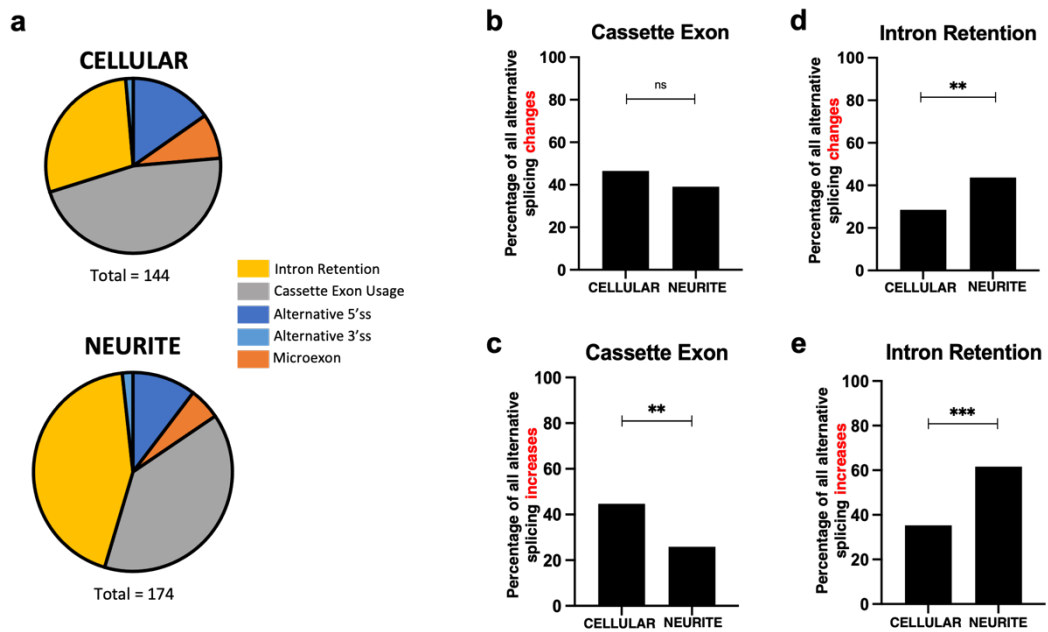

**Supplementary Fig. 6: Absence of SFPQ results in neurite-specific increases in intron retention.**

(a) Numbers of events of different splicing types showing statistically significant changes between sibling & null cellular (top) and neurite (bottom) samples. The largest number of changes between cellular compartments found, was in cassette exon usage (n=67; two-tailed Chi-Square = 4.5E-19), whilst between neurite compartments, was in intron retention (n=76; two-tailed Chi-Square = 1.4E-26). Changes between sibling and null samples in either direction had a vast-tools MV.[dPsi]\_at\_0.95 value  $\geq 0.03$  in the respective compartment comparison, and  $< 0.03$  for the alterative compartment comparison. No threshold for change (percentage of transcripts) or gene expression level were applied. The profile of splicing changes in null cellular is significantly different from neurite samples (two-tailed Chi-Square = 0.07). (b-e) Two-tailed Fisher's test analyses of intron retention (b-c) and cassette exon (d-e) changes shown in (a). (b & d) Show the proportion of all alternative splicing changes in null samples that are changes in cassette exon usage (exclusion or inclusion, b) and intron retention (d), and whether the effect is compartment specific (ns = p:0.21 &  $**=p:0053$ , respectively). (c & e) Show the extent to which increases in cassette exon usage/inclusion (c) and intron retention (e) contribute to all alternative splicing increases in null samples and show the compartment specificity of the phenotype ( $**=p:0.007$  and  $***=p:0.0003$ , respectively).



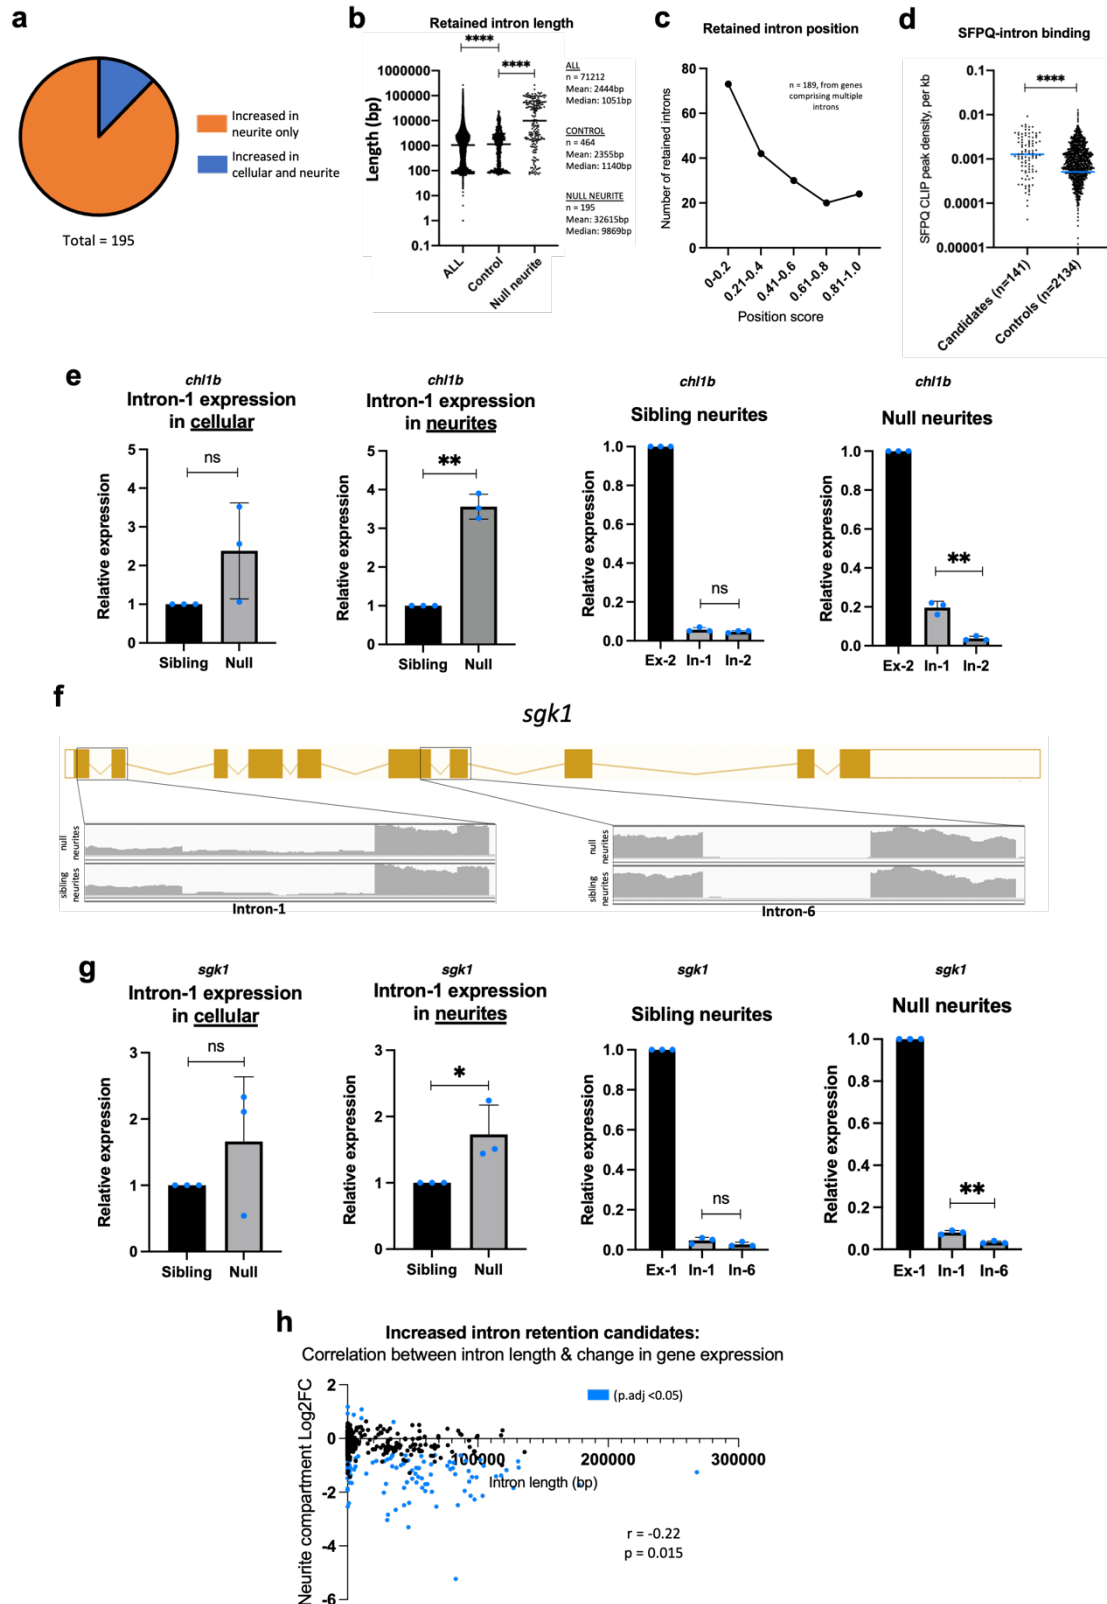

**Supplementary Fig. 7: Validation of increased intron retention in neurites of SFPQ-depleted neurons.** (a) Chart showing neurite-specificity of 195 increased intron retention events revealed by vast-tools. Candidates needed to be retained in at least 10% more of total gene transcripts in null neurites. Statistically significant changes (cellular and neurite comparisons) required an  $MV.[dPsi]_{at\_0.95} \geq 0.01$ . 195 introns were significantly changed: 24 increasingly retained in the cellular comparison, 171 (88%) were neurite-specific. (b) Lengths of introns showing increased

retention compared to all introns in the analysis, and controls (non-retained introns from the same genes as affected introns). Two-tailed Wilcoxon-signed rank tests, \*\*\*\*= $p < 0.0001$ . (c) Positional information for the 195 retained introns that come from multiple intron genes. (d) CLIP peak density scores for mouse homologues of the 195 introns in (a;  $n = 141$ ) and control non-retained introns ( $n = 2134$ ) from the same genes. Two-sided Wilcoxon signed-rank test, \*\*\*\*= $p < 0.0001$ . (e) RT-qPCR validation of *chl1b* intron-1 (102kbp long) increased retention in null neurites, and no retention of intron-2 (used as control) in either sibling or null neurites. Three biological replicates indicated by blue dots. Means plotted with SD; two-tailed unpaired ttests with Welch's correction, (left two panels) Intron-1 expression in null, relative to sibling levels,  $p: 0.1937$  & \*\*= $p: 0.0052$ , respectively; (right two panels) Expression of intron-1 and -2 relative to exon-2 expression, which is set to 1.  $p: 0.2739$  & \*\*= $p: 0.0073$ , respectively. (f) Serum/glucocorticoid regulated kinase 1 (*sgkl*) RNAseq BAM files showing increased intron-1 retention in null neurites, and no retention of control intron-6. (g) RT-qPCR validation of *sgkl* increased intron-1 (127bp) retention at DIV2. Three biological replicates indicated by blue dots. Means plotted with SD, two-tailed unpaired ttests; (left two panels) Intron-1 expression relative to exon-1 expression, which is set to 1.  $p: 0.3066$  & \*= $p: 0.0462$ , respectively; (right two panels) Expression of introns are relative to Exon-1 expression, which is set to 1.  $p: 0.1447$  & \*\*= $p: 0.0022$ , respectively. (h) Correlation between retained intron length and change in gene expression in null neurites. Blue datapoints: 124 intron-retaining genes exhibiting significant expression changes between sibling and null cellular samples ( $FDR < 0.05$ ). Two-sided Pearson correlation coefficient,  $r (-0.22)$  and  $p (0.015)$ . Source data are provided as a Source Data file.

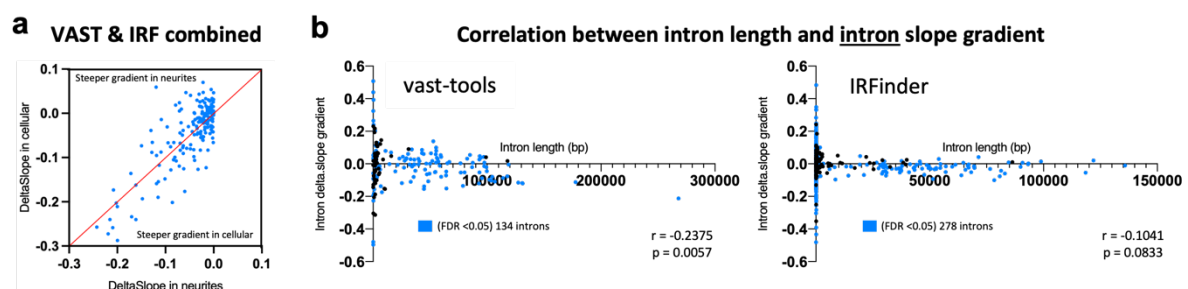

**Supplementary Fig. 8: Sloping IR genes in cellular and neurite compartments of SFPQ-depleted neurons.** (a) Four-way plot showing null cellular and neurite sample gene slope gradients for candidates that have negative slopes in neurites. Negative slope values are generally similar in neurite and cellular samples. Candidates were required to have null cellular and neurite slope gradients with  $FDR < 0.05$  in both ( $n = 184$ ). (b) Intron length correlates with negative sloping of reads mapped to retained introns in their 5'→3' direction.

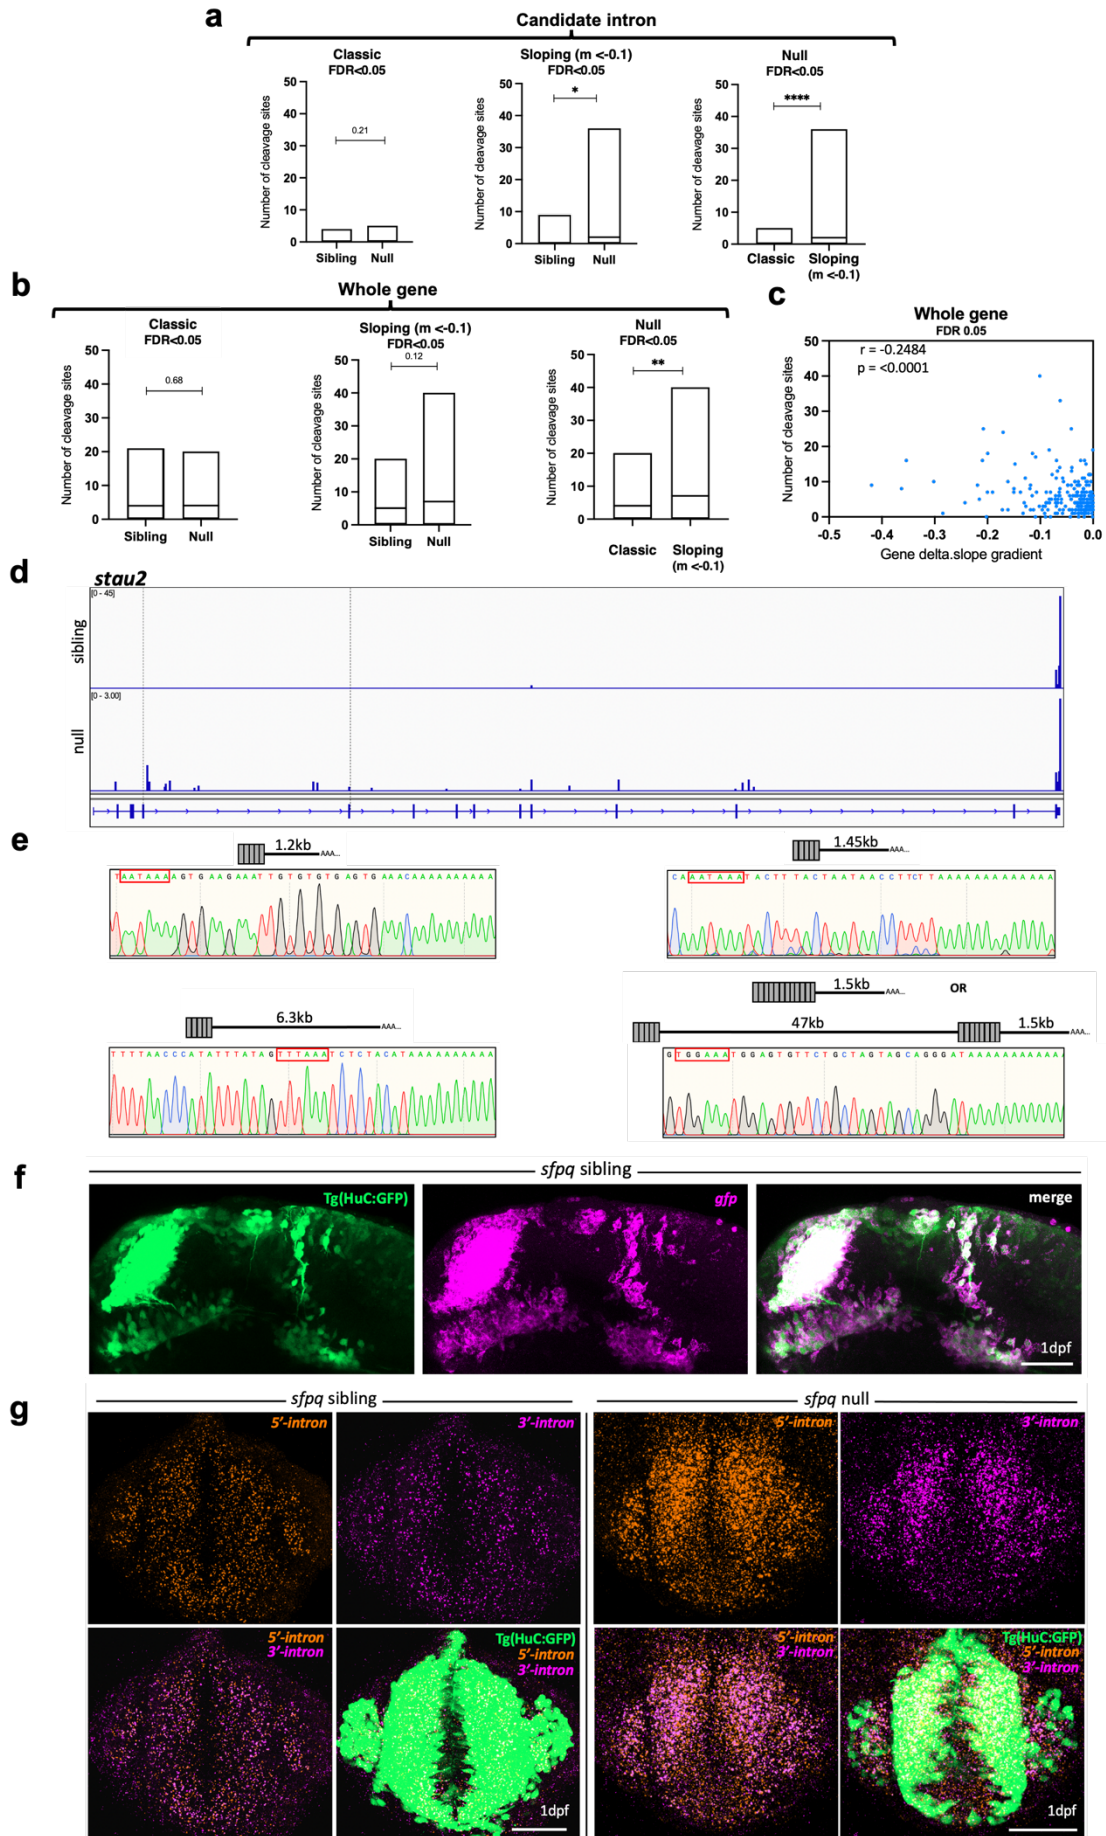

**Supplementary Fig. 9: Prematurely terminated, cleaved and polyadenylated IR transcripts localise to neurites in SFPQ-depleted neurons.** (a) Number of cleavage sites in introns of classic (Left) and sloping (Middle) IR-transcripts in sibling and null (FDR<0.05. Classic, n=107, Sloping, m,<-0.1, n=37). (Right): comparison of the number of cleavage sites in introns of classic and sloping IR-transcripts in null samples. Floating bar plots where the middle represents the median and the upper and lower limits represent the maximum and minimum values. Two-sided Mann-Whitney tests. (Left) p=0.21, (Middle) \*p:0.01 (Right) \*\*\*\*=p:<0.0001. (b) Number of cleavage sites along the entire length of classic and sloping genes and how these differ in sibling and null (FDR<0.05. Classic, n=107, Sloping, m,<-0.1, n=37). (Right) Comparison of cleavage site number in classic and sloping genes in null samples. Floating bar plots where the middle represents the median and the upper and lower limits represent the maximum and minimum values. Two-sided Mann-Whitney tests. (Left) p=0.68, (Middle) p=0.12 (Right) \*\*=p:0.0015. (c) Correlation between gene slope gradient and the number of cleavage sites across the whole length of the associated genes in null. Two-tailed Pearson correlation coefficient, r: -0.2484, p<0.0001 (n=247). (d) 3'mRNAseq read clusters along *stau2* in sibling (top) and null (bottom) 24hpf whole embryo samples, indicating sites of transcript cleavage and polyadenylation. Peak height indicates relative proportion of *stau2* transcripts using that cleavage site. Dashed lines demarcate retained intron-5. Black arrows indicate points of transcript termination targeted for 3'RACE in (e). (e) 3'RACE validation of *stau2* 3'mRNAseq results in (d), verifying the localisation of PreT-IR transcript isoforms to null neurites. Sequencing traces from 3'RACE products show terminal intronic sequences containing polyadenylation site consensus sequences (red boxes), and the start of the PolyA tail. (f-g) Confocal z-projections of 1dpf *sfpq*; tg(HuC:GFP) sibling & null embryos. Experiment repeated three times showing the same results. (f) Lateral view, anterior to the left, z-projections (50µm) of embryos after targeting *gfp* mRNA, indicating the protocol achieves high target specificity with minimal background signal. (g) Frontal z-projections (20µm) of embryos after targeting *igdcc3* intron-2 IR and PreT-IR transcripts with probe sets targeting the 5'-most 10kb (red) and 3'-most 10kb (magenta) of intron-2. Scale bars 50µm.

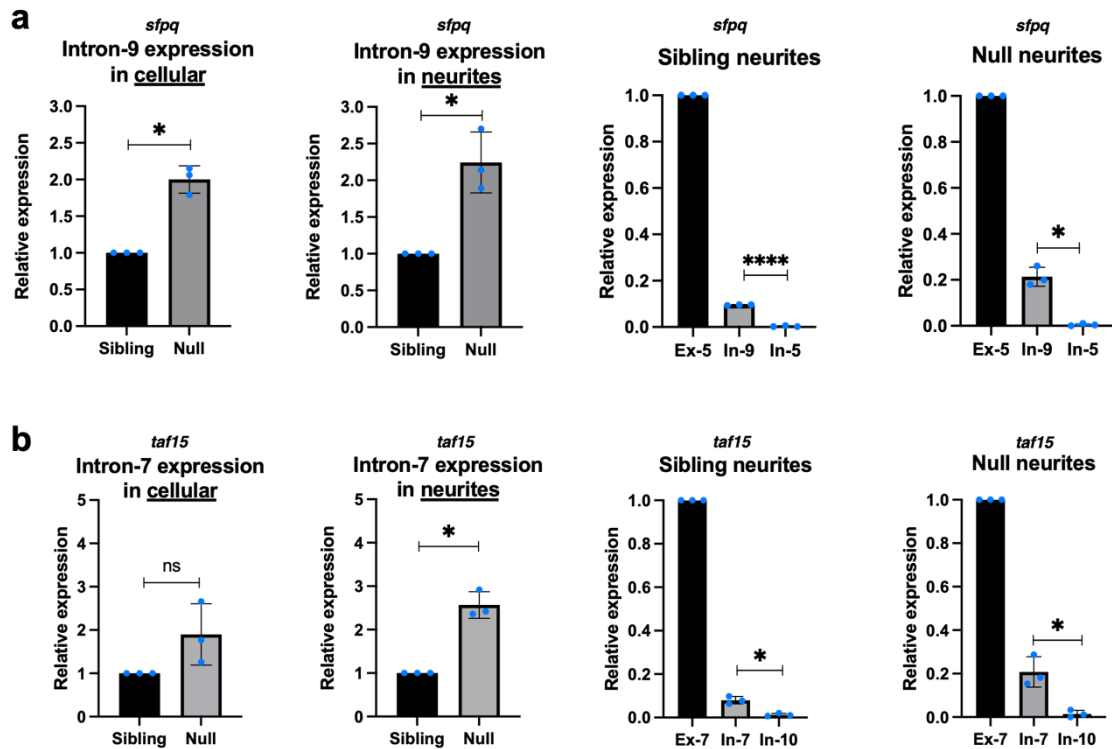

**Supplementary Fig. 10: RT-qPCR validation of increased retention of ALS-associated introns in neurites of SFPQ-depleted neurons.** (a) RT-qPCR validation of *sfpq* intron-9 and intron-5 expression levels. Intron expression normalised to exon-5 expression, which is set to 1. Three biological replicates. Results for individual replicates are indicated by blue dots. Means plotted with SD. Two-tailed unpaired ttests with Welch's correction, (left two panels) Intron-9 expression in null, relative to sibling levels,  $* = p: 0.0115$  &  $* = p: 0.0352$ , respectively; (right two panels) Expression of intron-9 and intron-5 relative to exon-5 expression for each sample.  $**** = p < 0.0001$  &  $* = p: 0.0122$ , respectively. (b) RT-qPCR validation of *taf15* intron-7 and control intron-10 levels. Intron expression is normalised to exon-7 expression, which is set to 1. Three biological replicates. Results for individual replicates are indicated by blue dots. Means plotted with SD. Two-tailed unpaired ttests with Welch's correction, (left two panels) Intron-7 expression in null, relative to sibling levels,  $p: 0.1597$  &  $* = p: 0.0126$ , respectively; (right two panels) Expression of intron-7 and intron-10 relative to exon-7 expression for each sample.  $* = p: 0.0119$  &  $* = p: 0.0354$ , respectively. Source data are provided as a Source Data file.

### Transcriptopathy in 4 ALS datasets

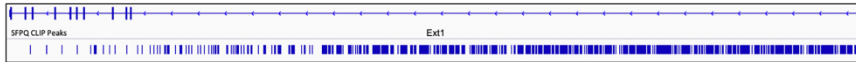

### Transcriptopathy in 3 ALS datasets

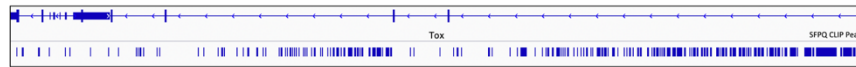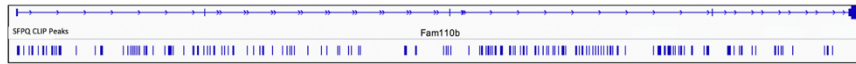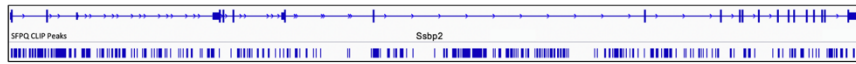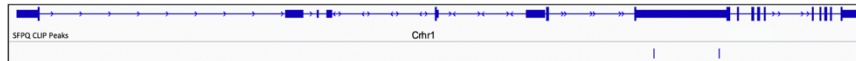

### Transcriptopathy in 2 ALS datasets

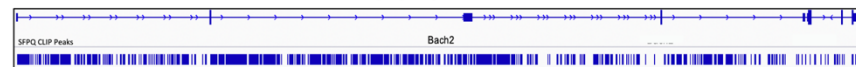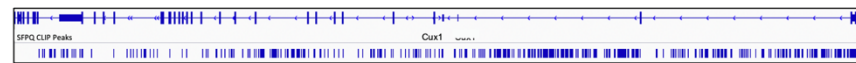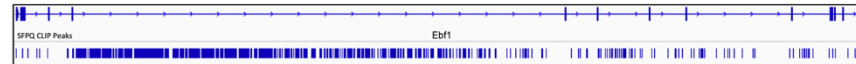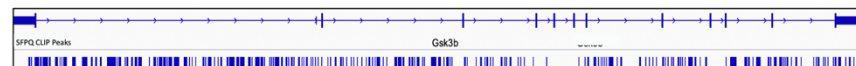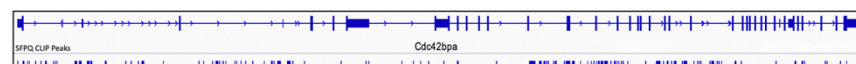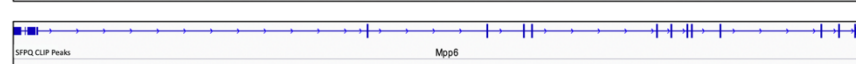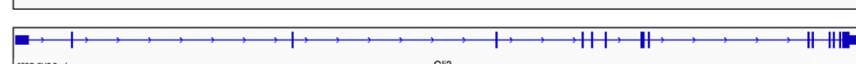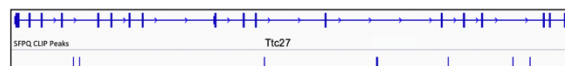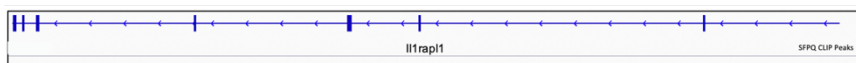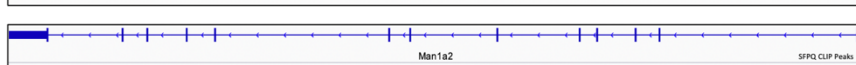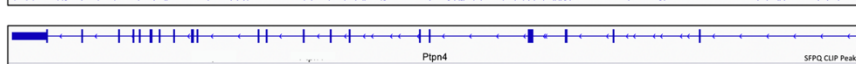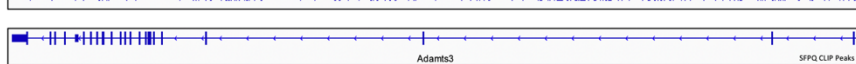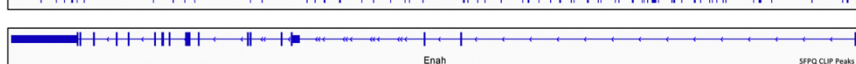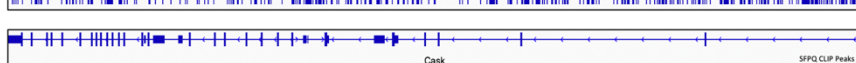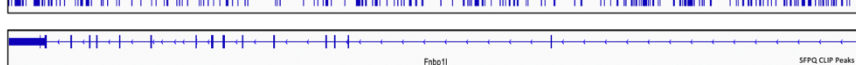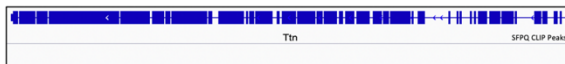

**Supplementary Fig. 11: Mouse homologues of genes suffering from transcriptopathy in ALS are SFPQ-binding targets.** Plots showing SFPQ CLIP binding peaks for mouse homologues of the 21 human genes showing transcriptopathy in ALS. Genes are listed in order of how many of the ALS datasets negative gene sloping was observed.

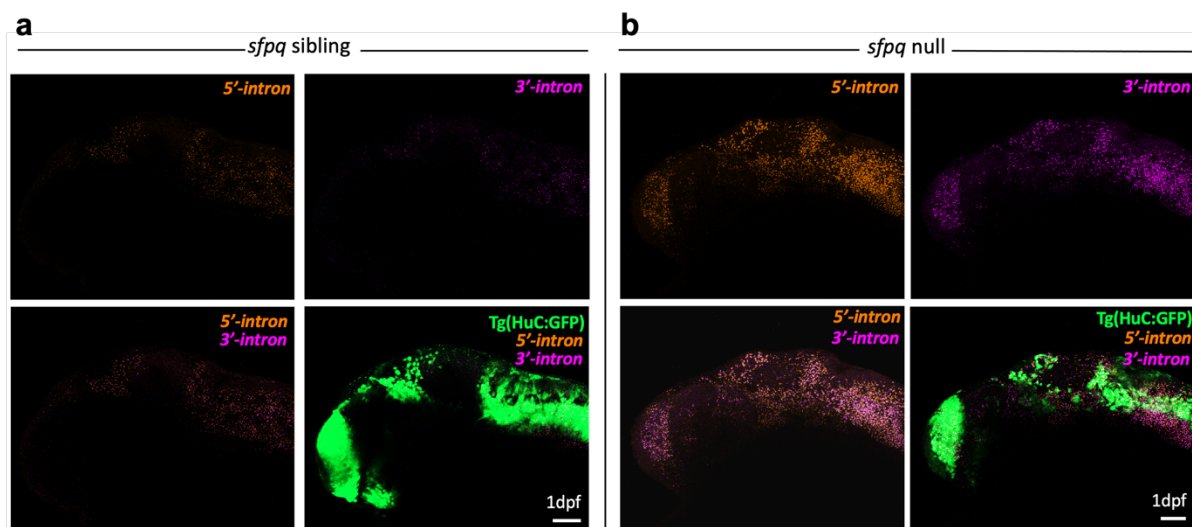

**Supplementary Fig. 12: HCR validation of increased *ebfla* IR and PreT-IR mRNAs in absence of SFPQ.** (a-b) Confocal z-projections (50 $\mu$ m), lateral view, anterior to the left, of 1dpf *sfpq*:tg(HuC:GFP) sibling (a) & null (b) embryos following HCR *in situ* hybridisation targeting *ebfla* intron-6 IR and PreT-IR transcripts with probe sets targeting the 5'-most 10kb of intron-6 (red) and the 3'-most 10kb of intron-6 (magenta). Experiment repeated three times showing the same results. Scale bars 50 $\mu$ m.

## Supplementary Tables

| <b>gene name</b> | <b>Chromosomal coordinates<br/>(danRer10)</b> |
|------------------|-----------------------------------------------|
| bicd1            | chr18:12148988-12149519                       |
| ccnl1a           | chr18:41524050-41526200                       |
| cdc37            | chrUn_KN149781v1:8333-8518                    |
| cntn5            | chr18:42550108-42551110                       |
| cpsf6            | chr4:2201209-2202571                          |
| ddx5             | chr3:25140624-25141471                        |
| foxk1            | chr3:40784354-40784620                        |
| hnrpdl           | chr10:5017211-5018391                         |
| insra            | chr2:37633836-37635424                        |
| ip6k2            | chr6:42418044-42418176                        |
| katnb1           | chr7:51890393-51890479                        |
| mgat4a           | chr9:7205400-7206073                          |
| mgat4b           | chr14:16386154-16387273                       |
| mgea5            | chr13:11864263-11867558                       |
| pias2            | chr5:40883980-40884051                        |
| plcb3            | chr7:59988747-59993662                        |
| ptbp2a           | chr24:30906040-30908582                       |
| ptprga           | chr11:5088146-5091460                         |
| sfpq             | chr19:40446206-40452280                       |
| srsf1b           | chr21:39525930-39526254                       |
| srsf5b           | chr20:28972734-28975395                       |
| taf15            | chr15:1874021-1874175                         |
| taf15            | chr15:1870698-1871229                         |
| tars             | chr5:43759825-43760707                        |
| tnrc6a           | chr3:35390725-35391907                        |
| u2surp           | chr2:26981096-26981618                        |

**Supplementary Table 1: ALS-associated intron zebrafish homologues changing in null neurites.** Chromosomal coordinates of zebrafish homologous sequences to human (hg19) and mouse (mm10) ALS-associated introns in supplementary data 8. Most homologous sequences were identified using LiftOver. Others were identified by manually identifying conserved exons flanking introns.



| gene_name | gene_length | source | dataset   | ALS.slope  | ALS.FDR    | Ctrl.slope | Ctrl.FDR   | deltaSlope |
|-----------|-------------|--------|-----------|------------|------------|------------|------------|------------|
| ADAMTS3   | 287831      | hg19   | Kapeli    | -0.1430921 | 0.04357726 | -0.0780222 | 0.07795231 | -0.0650699 |
| ADAMTS3   | 287831      | hg19   | Tam       | -0.3665839 | 0.02645913 | -0.269496  | 0.02810459 | -0.0970879 |
| Bach2     | 347305      | mm10   | Fratta    | 0.10422769 | 0.01367517 | 0.16561113 | 0.00239279 | -0.0613834 |
| BACH2     | 370380      | hg19   | Tam       | -0.4147708 | 0.02368988 | -0.2820375 | 0.03373779 | -0.1327333 |
| CASK      | 408530      | hg19   | dbGAP     | -0.3197458 | 0.0004129  | -0.2452457 | 0.0006924  | -0.0745001 |
| CASK      | 408530      | hg19   | Tam       | -0.5063408 | 0.0064886  | -0.3894378 | 0.00269847 | -0.116903  |
| CDC42BPA  | 328610      | hg19   | dbGAP     | -0.2097594 | 0.01058325 | -0.1572581 | 0.01898697 | -0.0525013 |
| CDC42BPA  | 328610      | hg19   | Tam       | -0.3660673 | 0.04287814 | -0.3087493 | 0.01776459 | -0.057318  |
| CRHR1     | 213928      | hg19   | dbGAP     | -0.6224442 | 0.00091456 | -0.5144334 | 0.00045762 | -0.1080108 |
| CRHR1     | 213928      | hg19   | Kapeli    | -0.6574627 | 0.00064554 | -0.3065992 | 0.00033717 | -0.3508635 |
| CRHR1     | 213928      | hg19   | Tam       | -0.6741939 | 0.00011094 | -0.4854412 | 0.00014787 | -0.1887528 |
| CUX1      | 468291      | hg19   | dbGAP     | -0.3539721 | 0.04513972 | -0.2770637 | 0.04262705 | -0.0769084 |
| CUX1      | 468020      | hg19   | dbGAP     | -0.3539721 | 0.04513972 | -0.2770637 | 0.04262705 | -0.0769084 |
| CUX1      | 468291      | hg19   | Tam       | -0.7480618 | 0.00524746 | -0.5454478 | 0.00543187 | -0.202614  |
| CUX1      | 468020      | hg19   | Tam       | -0.7480618 | 0.00524746 | -0.5454478 | 0.00543187 | -0.202614  |
| EBF1      | 403842      | hg19   | Kapeli    | -0.2048966 | 0.0293606  | -0.1016818 | 0.16044431 | -0.1032147 |
| EBF1      | 403842      | hg19   | Tam       | -0.4259566 | 0.01827206 | -0.2961014 | 0.01637938 | -0.1298552 |
| ENAH      | 166308      | hg19   | dbGAP     | -0.28601   | 0.00721496 | -0.202885  | 0.01503054 | -0.083125  |
| ENAH      | 166308      | hg19   | Tam       | -0.6260931 | 0.00080382 | -0.4518151 | 0.00079978 | -0.174278  |
| EXT1      | 317364      | hg19   | dbGAP     | -0.4210512 | 1.76E-06   | -0.3521093 | 1.21E-06   | -0.0689419 |
| EXT1      | 317364      | hg19   | Kapeli    | -0.4346188 | 1.27E-06   | -0.3615271 | 9.72E-06   | -0.0730917 |
| EXT1      | 317364      | hg19   | Prudencio | -0.3350004 | 0.01278941 | -0.0269035 | 0.61654063 | -0.3080969 |
| EXT1      | 317364      | hg19   | Tam       | -0.8883469 | 1.61E-06   | -0.6337064 | 1.61E-06   | -0.2546405 |
| FAM110B   | 209771      | hg19   | dbGAP     | -0.2886052 | 0.00038994 | -0.2348322 | 0.00049553 | -0.053773  |
| FAM110B   | 209771      | hg19   | Kapeli    | -0.3223436 | 0.0005597  | -0.2417645 | 0.02795265 | -0.0805791 |
| FAM110B   | 209771      | hg19   | Tam       | -0.75965   | 5.73E-06   | -0.5104219 | 3.13E-06   | -0.2492281 |
| FNBP1L    | 106531      | hg19   | Kapeli    | -0.2668782 | 0.01227335 | -0.2135553 | 0.01297815 | -0.0533229 |
| FNBP1L    | 106531      | hg19   | Tam       | -0.5362178 | 7.91E-05   | -0.3994781 | 2.87E-05   | -0.1367397 |
| GLI3      | 266792      | mm10   | Fratta    | 0.110264   | 0.01011365 | 0.16080444 | 0.00388117 | -0.0505404 |
| GLI3      | 276922      | hg19   | Tam       | -0.6053877 | 0.00248824 | -0.4508049 | 0.00215904 | -0.1545828 |
| GSK3B     | 273095      | hg19   | dbGAP     | -0.1736168 | 0.01853273 | -0.1164017 | 0.0406575  | -0.0572151 |
| GSK3B     | 273095      | hg19   | Kapeli    | -0.2093355 | 0.03535413 | -0.1432123 | 0.07609995 | -0.0661233 |
| IL1RAPL1  | 1369325     | hg19   | dbGAP     | -0.3980473 | 5.40E-12   | -0.329774  | 4.69E-12   | -0.0682733 |
| IL1RAPL1  | 1369325     | hg19   | Tam       | -0.8678064 | 6.71E-13   | -0.5651713 | 4.69E-12   | -0.3026352 |
| MAN1A2    | 161424      | hg19   | dbGAP     | -0.3223128 | 0.00344607 | -0.2720203 | 0.00367518 | -0.0502925 |
| MAN1A2    | 161424      | hg19   | Tam       | -1.0000002 | 0.00896601 | -0.7724933 | 0.01053199 | -0.2275069 |
| MPP6      | 120926      | hg19   | dbGAP     | -0.4311177 | 0.00045512 | -0.335422  | 0.00038    | -0.0956956 |
| MPP6      | 120926      | hg19   | Tam       | -0.7344837 | 0.00106612 | -0.589397  | 0.00076124 | -0.1450867 |
| PTPN4     | 224188      | hg19   | dbGAP     | -0.2193462 | 0.00564127 | -0.1635961 | 0.01030999 | -0.0557501 |
| PTPN4     | 224188      | hg19   | Tam       | -0.5501958 | 0.00781406 | -0.4358137 | 0.00371439 | -0.1143821 |
| SSBP2     | 338777      | hg19   | dbGAP     | -0.3801758 | 0.00777705 | -0.3220598 | 0.0043679  | -0.058116  |
| SSBP2     | 338777      | hg19   | Prudencio | -0.330192  | 0.04517586 | -0.0215085 | 0.66360558 | -0.3086835 |
| SSBP2     | 338777      | hg19   | Tam       | -0.7904475 | 0.01101675 | -0.5787241 | 0.00959026 | -0.2117234 |
| TOX       | 313791      | hg19   | Kapeli    | -0.3401924 | 3.64E-05   | -0.222814  | 0.00014787 | -0.1173785 |
| TOX       | 313791      | hg19   | Prudencio | -0.1688098 | 0.02493083 | 0.01585519 | 0.74122262 | -0.184665  |
| TOX       | 313791      | hg19   | Tam       | -0.7613675 | 8.86E-08   | -0.5455356 | 9.07E-08   | -0.2158319 |
| TTC27     | 193020      | hg19   | Kapeli    | -0.1891719 | 0.00228251 | -0.0872767 | 0.11594383 | -0.1018952 |
| TTC27     | 193020      | hg19   | Tam       | -0.5049881 | 0.00011203 | -0.3166787 | 8.64E-05   | -0.1883094 |
| Ttn       | 278568      | mm10   | Bozzoni   | 0.41634782 | 2.77E-11   | 0.6429872  | 6.27E-13   | -0.2266394 |
| Ttn       | 278568      | mm10   | Fratta    | 0.08756394 | 8.42E-05   | 0.21186637 | 0.00103232 | -0.1243024 |

**Supplementary Table 2: Transcriptopathy in ALS candidate genes.** 21 long genes that show statistically significant transcriptopathy in two or more of 6 ALS datasets compared to control (FDR <0.05).
