# Supplementary material for: Prematurely terminated intron-retaining mRNAs invade axons in SFPQ null-driven neurodegeneration and are a hallmark of ALS
Source: PubMed Central journal article supplement (PMC9681851; doi:10.1038/s41467-022-34331-4), 2022-11-22
Supplement: 41467_2022_34331_MOESM3_ESM.pdf [file 41467_2022_34331_MOESM3_ESM.pdf]

## Description of Additional Supplementary Files

**Supplementary Data 1: Genes enriched in sibling cellular and neurite samples.** Genes enriched in sibling cellular compartment compared to sibling neurite compartment (fold change > 1.5,  $p < 0.05$ ). Genes enriched in sibling neurite compartments compared to sibling cellular compartment (fold change > 1.25,  $p < 0.05$ ).

**Supplementary Data 2: Gene downregulation in neurites (and neurite-specific).** 597 annotated genes expressed more in sibling neurites (FC > 1.5) than in null neurites. Genes were filtered to remove those expressed < 20 TpM in sibling neurites. 185 genes annotated genes downregulated more in null neurites than in null cellular samples ( $\text{Log}_2\text{FC Neurites} - \text{Log}_2\text{FC Cellular} = < -0.2$ ).

**Supplementary Data 3: Gene upregulation in neurites (and neurite-specific).** 221 annotated genes expressed more in null neurites (FC > 1.5) than in sibling neurites. Genes were filtered to remove those expressed < 20 TpM in sibling neurites. 62 genes annotated genes upregulated more in null neurites than in null cellular samples ( $\text{Log}_2\text{FC Neurites} - \text{Log}_2\text{FC Cellular} = > 0.2$ ).

**Supplementary Data 4: Initial splicing analysis.** All splicing changes (alternative 5'SS (Alt5), alternative 3'SS (Alt3), cassette exon (CE), microexon (MIC), intron retention (IR)) detected using vast-tools. Changes between sibling and null samples required  $\text{MV}[\text{dPsi}]_{\text{at}_0.95} = \geq 0.03$  in the respective compartment comparison, and  $\text{MV}[\text{dPsi}]_{\text{at}_0.95} = < 0.03$  for the other compartment comparison. No threshold for extent of change (percentage of total transcripts showing the splicing change in question), or gene expression level were applied.

**Supplementary Data 5: vast-tools and IRFinder intron retention.** 195 introns more retained and 35 introns less retained in null neurites than in sibling neurites (>10% change in either direction of transcripts being intron-retaining and  $\text{MV}[\text{dPsi}]_{\text{at}_0.95}$  value  $\geq 0.01$ ). In IRFinder analyses, 446 IR events showed increases (> 0.1 increase in IR Ratio)  $p < 0.05$ , and 86 events showed decreases (< -0.1 increase in IR Ratio)  $p < 0.05$  in retention in null neurites when compared to sibling counterparts.

**Supplementary Data 6: Genes whose transcripts are preferentially translated in neurites.** Ribosomal footprint (Riboseq) data from rat hippocampus indicates that orthologues of 154 zebrafish genes, whose transcripts showing neurite-specific increases in IR, are preferentially translated in neurites.

**Supplementary Data 7: Stable versus negative sloping gene lists.** Of the genes identified by vast-tools to exhibit increased intron retention in null neurites, 46 show stable downstream exon expression and 135 intron-retaining genes show negative downstream exon expression. Full candidate lists shown before filtering out those with values whose  $\text{FDR} > 0.05$ . Of the IRFinder identified genes exhibiting increased intron retention in null neurites, 157 show stable downstream exon expression and 252 intron-retaining genes show negative downstream exon expression. Full candidate lists shown before filtering out those with values whose  $\text{FDR} > 0.05$ .

**Supplementary Data 8: ALS-associated human and mouse introns.** Chromosomal coordinates of human (hg19) and mouse (mm10) introns perturbed in ALS patient samples and models of ALS.

**Supplementary Data 9: Enriched Gene Ontology Biological Processes**

**Supplementary Data 10: Primers**
